# Supplementary material
Source: PubMed Central journal article supplement (PMC4443272)
Supplement: NIHMS668425-supplement-01.pdf [file NIHMS668425-supplement-01.pdf]

Table S1. Cannabis Abstinence as Measured by Urine Toxicology

|         | <b>MET/CBT+CM+PT</b> |           | <b>MET/CBT+CM</b> |           | <b>MET/CBT</b> |           |
|---------|----------------------|-----------|-------------------|-----------|----------------|-----------|
|         | n                    | Abstinent | n                 | Abstinent | n              | Abstinent |
|         |                      | n (%)     |                   | n (%)     |                | n (%)     |
| ETX     | 40                   | 25 (63)   | 40                | 30 (75)   | 41             | 17 (41)   |
| ETX+3M  | 29                   | 12 (41)   | 31                | 12 (39)   | 27             | 11 (41)   |
| ETX+6M  | 26                   | 10 (38)   | 30                | 5 (17)    | 35             | 9 (25)    |
| ETX+9M  | 27                   | 5 (19)    | 29                | 7 (24)    | 28             | 4 (14)    |
| ETX+12M | 30                   | 9 (30)    | 33                | 7 (21)    | 33             | 5 (15)    |

Note: Percentages calculated using available data (missing=missing). CBT = cognitive-behavioral therapy; CM = contingency management; ETX = end of treatment; M = months; MET = motivational enhancement therapy; PT = parent training.

Table S2. Mean Cannabis Use Frequency From Intake to 12 Months Posttreatment (Missing=Missing)

|         | <b>MET/CBT+CM+PT</b> |           | <b>MET/CBT+CM</b> |           | <b>MET/CBT</b> |           |
|---------|----------------------|-----------|-------------------|-----------|----------------|-----------|
|         | n                    | Use       | n                 | Use       | n              | Use       |
|         |                      | Mean (SD) |                   | Mean (SD) |                | Mean (SD) |
| Intake  | 51                   | 2.0 (0.9) | 51                | 1.9 (0.8) | 51             | 2.1 (0.8) |
| ETX     | 49                   | 1.2 (1.0) | 44                | 1.1 (1.1) | 45             | 1.3 (1.0) |
| ETX+3M  | 42                   | 1.4 (1.2) | 38                | 1.3 (1.0) | 38             | 1.2 (0.9) |
| ETX+6M  | 40                   | 1.3 (1.2) | 36                | 1.5 (1.1) | 37             | 1.6 (1.1) |
| ETX+9M  | 37                   | 1.5 (1.2) | 34                | 1.7 (1.1) | 35             | 1.5 (1.1) |
| ETX+12M | 33                   | 1.5 (1.1) | 33                | 1.8 (1.1) | 34             | 1.6 (1.0) |

Note: Use frequency is coded from the Timeline Follow Back Calendar as 0=0% days used, 1= $\geq 1$  and <15% of days used, 2= $\geq 15\%$  and <50% of days used, and 3= $\geq 50\%$  days used. CBT = cognitive-behavioral therapy; CM = contingency management; ETX = end of treatment; M = months; MET = motivational enhancement therapy; PT = parent training.

Table S3. Parenting and Externalizing Scores at Each Assessment (Missing=Missing)

|                                | MET/CBT+CM+PT |      |      | MET/CBT+CM |      |      | MET/CBT |      |      |
|--------------------------------|---------------|------|------|------------|------|------|---------|------|------|
|                                | n             | Mean | SD   | n          | Mean | SD   | n       | Mean | SD   |
| <b>Positive Involvement</b>    |               |      |      |            |      |      |         |      |      |
| Intake                         | 51            | 3.7  | 0.6  | 51         | 3.7  | 0.6  | 51      | 3.7  | 0.6  |
| ETX                            | 37            | 3.6  | 0.6  | 36         | 3.7  | 0.4  | 38      | 3.8  | 0.6  |
| ETX+6M                         | 28            | 3.6  | 0.6  | 27         | 3.8  | 0.5  | 25      | 3.9  | 0.4  |
| ETX+12M                        | 26            | 3.7  | 0.6  | 28         | 3.8  | 0.6  | 28      | 3.7  | 0.7  |
| <b>Deficient Monitoring</b>    |               |      |      |            |      |      |         |      |      |
| Intake                         | 51            | 3.2  | 0.9  | 51         | 3.0  | 0.7  | 51      | 3.2  | 0.7  |
| ETX                            | 37            | 3.1  | 0.9  | 36         | 2.7  | 0.7  | 38      | 2.8  | 0.7  |
| ETX+6M                         | 28            | 3.1  | 0.9  | 27         | 3.0  | 0.6  | 25      | 2.8  | 0.7  |
| ETX+12M                        | 26            | 3.3  | 0.8  | 28         | 3.0  | 0.5  | 28      | 2.8  | 0.7  |
| <b>Negative Discipline</b>     |               |      |      |            |      |      |         |      |      |
| Intake                         | 51            | 1.3  | 0.4  | 51         | 1.3  | 0.3  | 51      | 1.4  | 0.4  |
| ETX                            | 37            | 1.3  | 0.4  | 36         | 1.2  | 0.3  | 38      | 1.2  | 0.3  |
| ETX+6M                         | 28            | 1.2  | 0.4  | 27         | 1.3  | 0.3  | 25      | 1.2  | 0.4  |
| ETX+12M                        | 26            | 1.2  | 0.4  | 28         | 1.2  | 0.3  | 28      | 1.2  | 0.3  |
| <b>Externalizing (T score)</b> |               |      |      |            |      |      |         |      |      |
| Intake                         | 51            | 64.7 | 9.8  | 51         | 61.8 | 10.4 | 51      | 63.3 | 9.4  |
| ETX                            | 37            | 62.6 | 14.6 | 35         | 57.0 | 11.4 | 37      | 57.3 | 9.6  |
| ETX+6M                         | 24            | 58.8 | 12.3 | 27         | 52.2 | 10.9 | 25      | 58.8 | 13.5 |
| ETX+12M                        | 25            | 56.4 | 12.0 | 27         | 52.6 | 11.7 | 24      | 56.0 | 9.5  |

Note: CBT = cognitive-behavioral therapy; CM = contingency management; ETX = end of treatment; M = months; MET = motivational enhancement therapy; PT = parent training.

Table S4. *DSM* Mental Health and Non-Cannabis Substance Use Diagnoses

|                                              | MET/CBT+CM+PT<br>(n = 51)<br>n (%) | MET/CBT+CM<br>(n = 51)<br>n (%) | MET/CBT<br>(n = 51)<br>n (%) | X <sup>2</sup> or F |
|----------------------------------------------|------------------------------------|---------------------------------|------------------------------|---------------------|
| <b><i>DSM</i> Mental Health</b>              |                                    |                                 |                              |                     |
| <i>Parent Report</i> <sup>a</sup>            |                                    |                                 |                              |                     |
| ODD+/or CD                                   | 25 (49.0)                          | 20 (39.2)                       | 17 (33.3)                    | 2.66                |
| ADHD                                         | 20 (39.2)                          | 12 (23.5)                       | 14 (27.5)                    | 3.23                |
| Major Depression +/-or<br>GAD                | 11 (21.6)                          | 4 (7.8)                         | 8 (15.7)                     | 3.79                |
| <i>Youth Report</i>                          |                                    |                                 |                              |                     |
| ODD+/or CD                                   | 12 (23.5)                          | 13 (25.5)                       | 13 (25.5)                    | .07                 |
| ADHD                                         | 8 (15.7)                           | 6 (11.8)                        | 8 (15.7)                     | .43                 |
| Major Depression +/-or<br>GAD                | 9 (17.9)                           | 7 (13.7)                        | 5 (9.8)                      | 1.33                |
| <b><i>DSM</i> Substance Use</b> <sup>b</sup> |                                    |                                 |                              |                     |
| Sedative Abuse                               | 4 (7.8)                            | 2 (3.9)                         | 0 (0.0)                      | .17 <sup>c</sup>    |
| Cocaine Abuse                                | 0 (0.0)                            | 1 (2.0)                         | 0 (0.0)                      | 1.00 <sup>c</sup>   |
| Amphetamine Abuse                            | 1 (2.0)                            | 0 (0.0)                         | 0 (0.0)                      | 1.00 <sup>c</sup>   |
| Opiate Abuse                                 | 1 (2.0)                            | 1 (2.0)                         | 2 (3.9)                      | 1.00 <sup>c</sup>   |
| Hallucinogen Abuse                           | 1 (2.0)                            | 0 (0.0)                         | 0 (0.0)                      | 1.00 <sup>c</sup>   |
| Hallucinogen Dependence <sup>d</sup>         | 0 (0.0)                            | 0 (0.0)                         | 1 (2.0)                      | 1.00 <sup>c</sup>   |

Note: ADHD = attention-deficit/hyperactivity disorder; CBT = cognitive-behavioral therapy; CD = conduct disorder; CM = contingency management; GAD= generalized anxiety disorder; MET = motivational enhancement therapy; ODD = oppositional defiant disorder; PT = parent training.

<sup>a</sup> Endorsed by primary parent.

<sup>b</sup> Additional *DSM* Substance Use diagnoses based on youth interview.

<sup>c</sup> Value represents Fisher's exact test due to one or more cells with < 5 cases.

<sup>d</sup> The youth who met criteria for hallucinogen dependence reported no use in the past 80 days.

\*  $p < .05$

### **Supplemental Figure Legends:**

S1: Posttreatment cannabis abstinence. Note: CBT = cognitive-behavioral therapy; CM = contingency management; MET = motivational enhancement therapy; Prob = probability; PT = parent training.

S2: Cannabis use frequency. Note: CBT = cognitive-behavioral therapy; CM = contingency management; ETX = end of treatment; M = month; MET = motivational enhancement therapy; PT = parent training.
